# Supplementary material for: Quantifying the relationship between genetic diversity and population size suggests natural selection cannot explain Lewontin’s Paradox
Source: eLife journal article supplement (doi:10.7554/elife.67509), 2021-08-19

pairwise diversity (differences per bp)

$10^{-1}$   
 $10^{-2}$   
 $10^{-3}$   
 $10^{-4}$

$10^4$   $10^6$   $10^8$   $10^{10}$   $10^{12}$   $10^{14}$   $10^{16}$

approximate population size

Annelida Cnidaria Nematoda  
Arthropoda Echinodermata Nemertea  
Chordata Mollusca Porifera

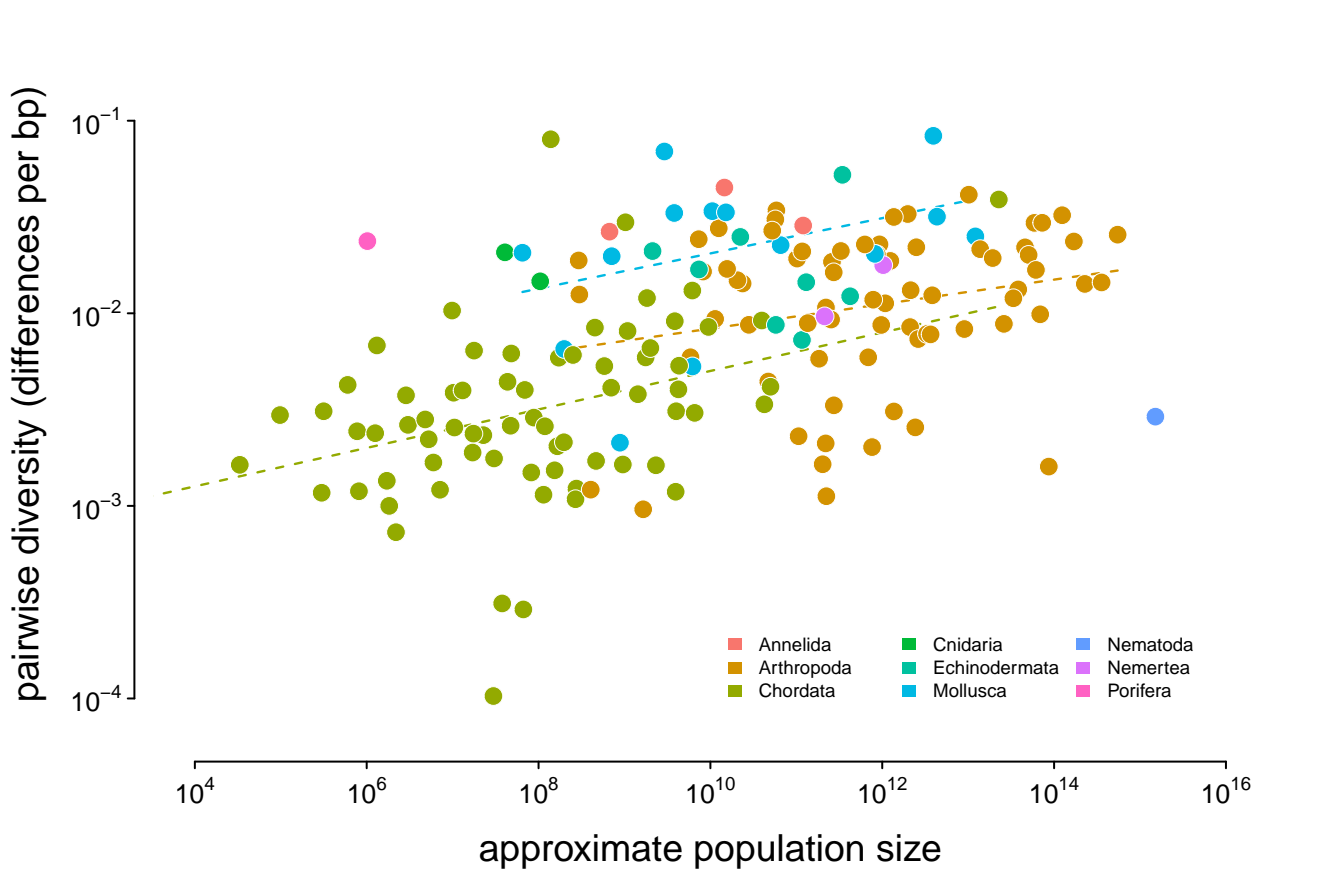

Supplement: supp [file elife_poa_e67509_Figure_2_figure_supplement_2..pdf › elife_poa_e67509_Figure_2_figure_supplement_2..pdf]
