# Supplementary material for: Quantifying the relationship between genetic diversity and population size suggests natural selection cannot explain Lewontin’s Paradox
Source: eLife journal article supplement (doi:10.7554/elife.67509), 2021-08-19

Arthropoda

intercept ( $\phi$ )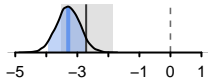slope ( $\beta$ )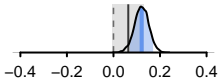phylo. signal ( $\lambda$ )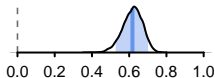

Mollusca

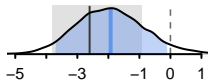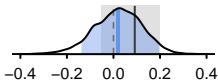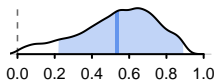

Chordates

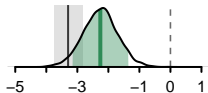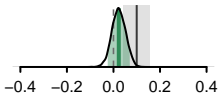phylo. variance ( $\sigma_p^2$ )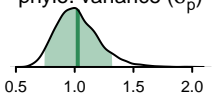

Supplement: supp [file elife_poa_e67509_Figure_3_figure_supplement_1.pdf › elife_poa_e67509_Figure_3_figure_supplement_1.pdf]
