# Supplementary material for: Quantifying the relationship between genetic diversity and population size suggests natural selection cannot explain Lewontin’s Paradox
Source: eLife journal article supplement (doi:10.7554/elife.67509), 2021-08-19
Supplement: supp [file elife_poa_e67509_Figure_3_figure_supplement_3.pdf › elife_poa_e67509_Figure_3_figure_supplement_3.pdf]

log10(pop size)

log10(map length)

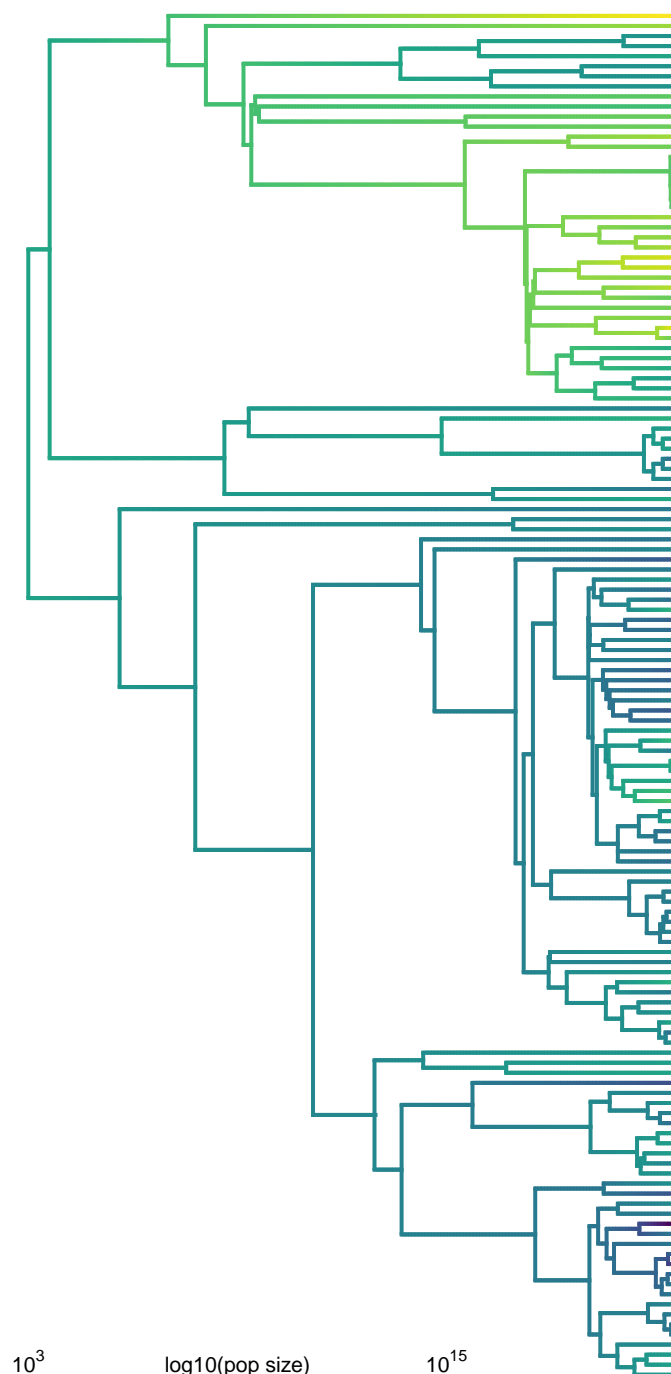

*Caenorhabditis elegans*  
*Ixodes scapularis*  
*Scylla paramamosain*  
*Portunus trituberculatus*  
*Eriocheir sinensis*  
*Penaeus vannamei*  
*Penaeus monodon*  
*Penaeus japonicus*  
*Tyngopus californicus*  
*Artemia franciscana*  
*Daphnia magna*  
*Daphnia pulex*  
*Acyrtosiphon pisum*  
*Nilaparvata lugens*  
*Vespa vulgaris*  
*Acromyrmex echinator*  
*Pogonomyrmex rugosus*  
*Apis cerana*  
*Apis mellifera*  
*Bombus terrestris*  
*Rhyzopertha dominica*  
*Leptothorax aculeator*  
*Tribolium confusum*  
*Tribolium castaneum*  
*Aedes aegypti*  
*Aedes albopictus*  
*Culex pipiens*  
*Anopheles gambiae*  
*Anopheles funestus*  
*Clunio marinus*  
*Zeugodacus cucurbitae*  
*Drosophila melanogaster*  
*Drosophila serrata*  
*Papilio glaucus*  
*Heliconius melpomene*  
*Bicyclus anynana*  
*Bombyx mori*  
*Bombyx mandarina*  
*Biston betularia*  
*Hyriopsis cumingii*  
*Ruditapes philippinarum*  
*Ostrea edulis*  
*Magallana gigas*  
*Crassostrea virginica*  
*Mizuhopecten yessoensis*  
*Azuropecten farreri*  
*Argopecten irradians*  
*Halotis midiae*  
*Halotis diversicolor*  
*Apocricopeus japonicus*  
*Ciona savignyi*  
*Ciona intestinalis*  
*Lepidosteus oculatus*  
*Anguilla japonica*  
*Scleropages formosus*  
*Gadus morhua*  
*Lepomis macrochirus*  
*Epiplatys spilargyreus*  
*Anoplopoma fimbria*  
*Gasterosteus aculeatus*  
*Sciaenops ocellatus*  
*Larimichthys crocea*  
*Sparus aurata*  
*Takifugu rubripes*  
*Dicentrarchus labrax*  
*Seriola lalandi*  
*Lates calcarifer*  
*Oryzias latipes*  
*Scophthalmus maximus*  
*Paralichthys olivaceus*  
*Hippoglossus hippoglossus*  
*Oryzias latipes*  
*Kryptolebias marmoratus*  
*Neotrichostichus furzeri*  
*Lucania parva*  
*Lucania godeii*  
*Phallostethus caudimaculatus*  
*Xiphophorus maculatus*  
*Poecilia reticulata*  
*Oreochromis mossambicus*  
*Oreochromis niloticus*  
*Melanocheilichthys*  
*Haplochromis burtoni*  
*Haplochromis sauvagii*  
*Haplochromis chilotis*  
*Eschscholus*  
*Coregonus clupeaformis*  
*Salmo trutta*  
*Salmo salar*  
*Oncorhynchus kisutch*  
*Oncorhynchus tshawytscha*  
*Oncorhynchus mykiss*  
*Oncorhynchus nerka*  
*Aspioneta mexicana*  
*Ichthyophaga*  
*Misgurnus anguillicaudatus*  
*Danio rerio*  
*Labo rohita*  
*Carassius auratus*  
*Cyprinus carpio*  
*Ctenopharyngodon idella*  
*Hypophthalmichthys nobilis*  
*Hypophthalmichthys molitrix*  
*Amphioxus*  
*Xenopus tropicalis*  
*Rana temporaria*  
*Crocodylus porosus*  
*Anas platyrhynchos*  
*Coturnix japonica*  
*Gallus gallus*  
*Meleagris gallopavo*  
*Perus major*  
*Cyanistes caeruleus*  
*Melospiza melodia*  
*Taeniopygia guttata*  
*Ficedula albicollis*  
*Monodelphis domestica*  
*Notamacropus eugenii*  
*Felis silvestris*  
*Canis lupus*  
*Equus przewalskii*  
*Equus caballus*  
*Sus scrofa*  
*Bos taurus*  
*Bison bison*  
*Ovis canadensis*  
*Ovis aries*  
*Capra hircus*  
*Homo sapiens*  
*Micaea mulatta*  
*Papio anubis*  
*Papio hamadryas*  
*Oryzomys carolinensis*  
*Microtus ochrogaster*  
*Peromyscus maniculatus*  
*Rattus norvegicus*

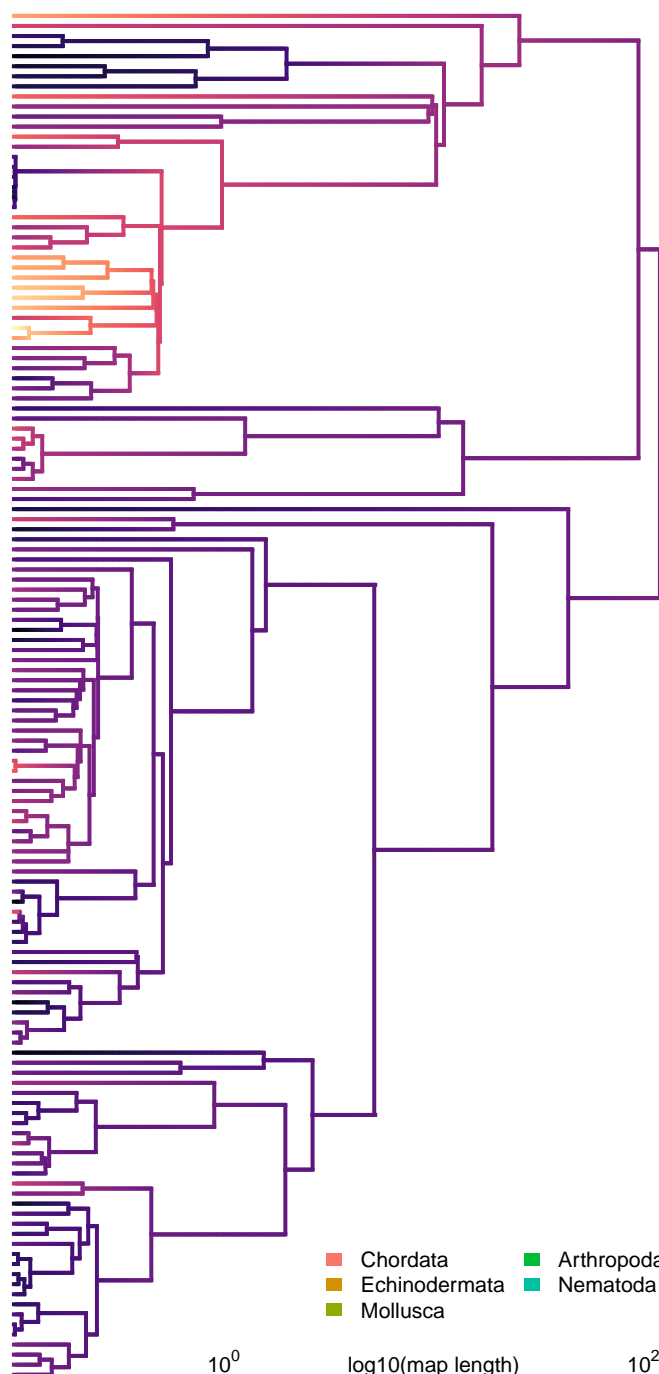

Chordata  
 Echinodermata  
 Mollusca  
 Arthropoda  
 Nematoda

10<sup>3</sup> log10(pop size)10<sup>15</sup>10<sup>0</sup> log10(map length)10<sup>2</sup>
