# Supplementary figures and images for: Quantifying the relationship between genetic diversity and population size suggests natural selection cannot explain Lewontin’s Paradox
Source: eLife journal article supplement (doi:10.7554/elife.67509), 2021-08-19

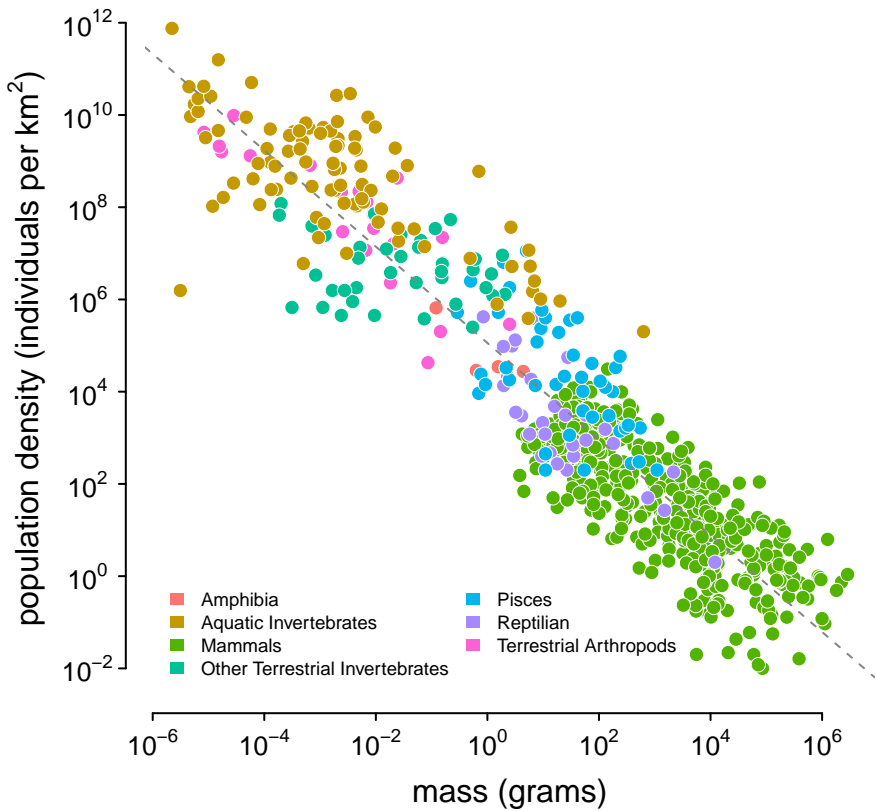

Supplement: supp [file elife_poa_e67509_Figure_1_figure_supplement_1.pdf › elife_poa_e67509_Figure_1_figure_supplement_1.pdf]

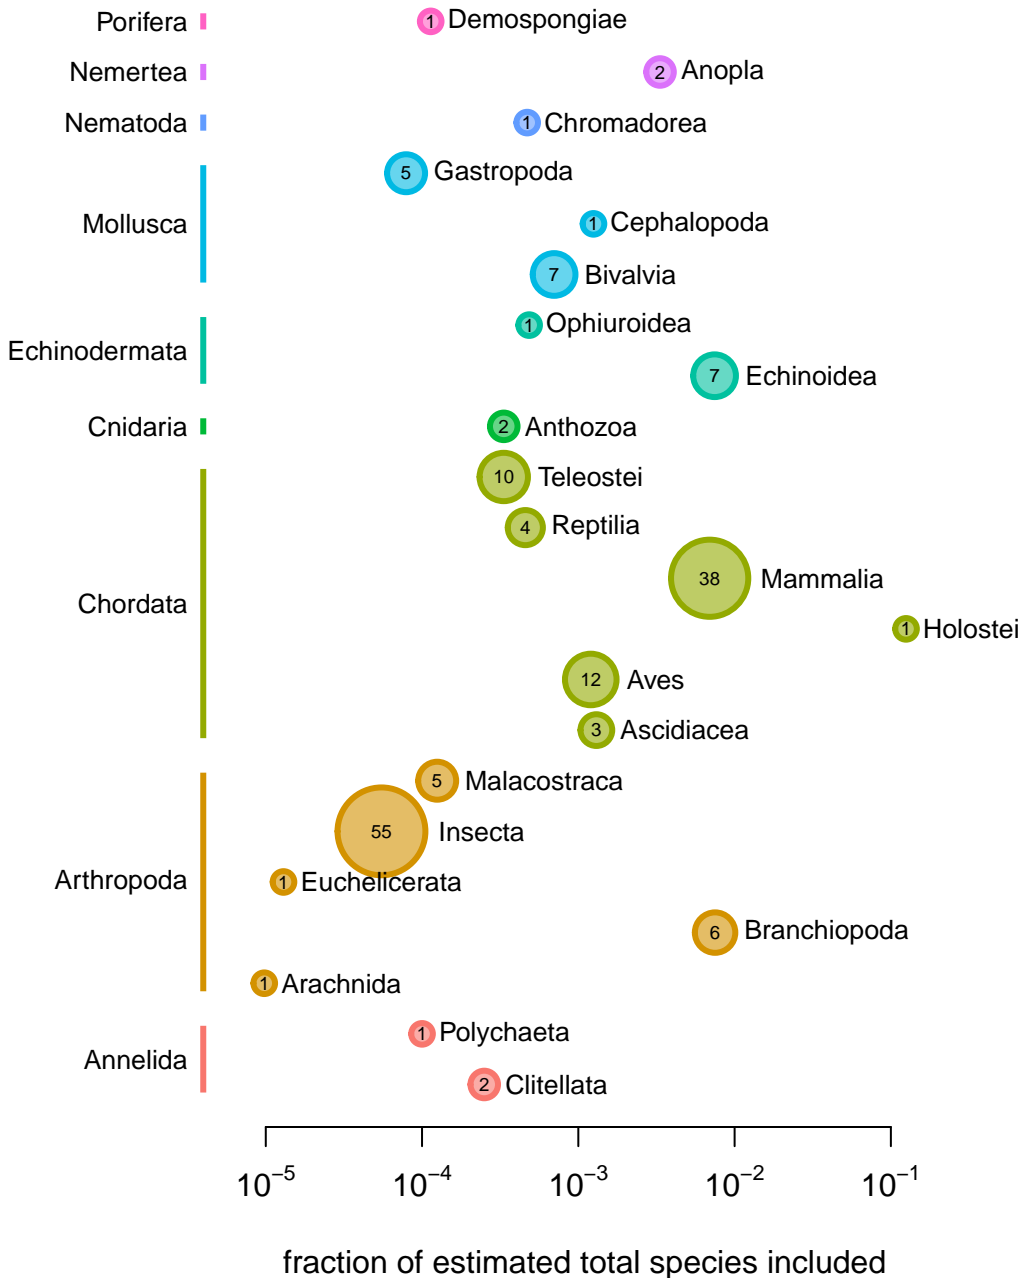

Supplement: supp [file elife_poa_e67509_Figure_1_figure_supplement_2.pdf › elife_poa_e67509_Figure_1_figure_supplement_2.pdf]

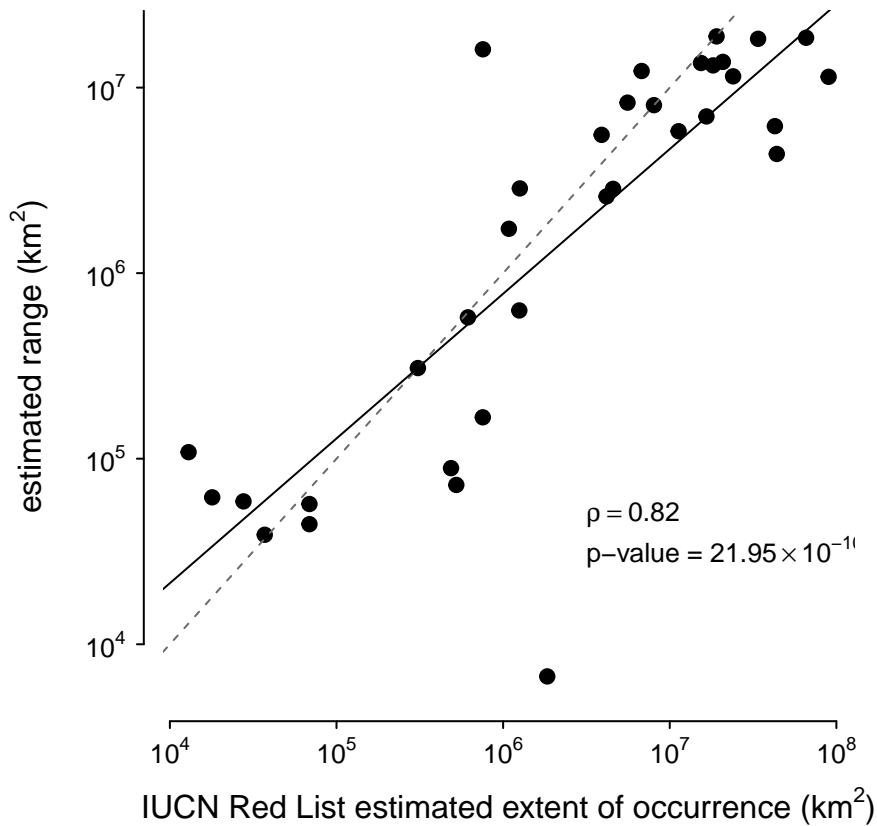

Supplement: supp [file elife_poa_e67509_Figure_1_figure_supplement_3.pdf › elife_poa_e67509_Figure_1_figure_supplement_3.pdf]

- Island
- Narrow endemic
- Broad endemic
- Cosmopolitan

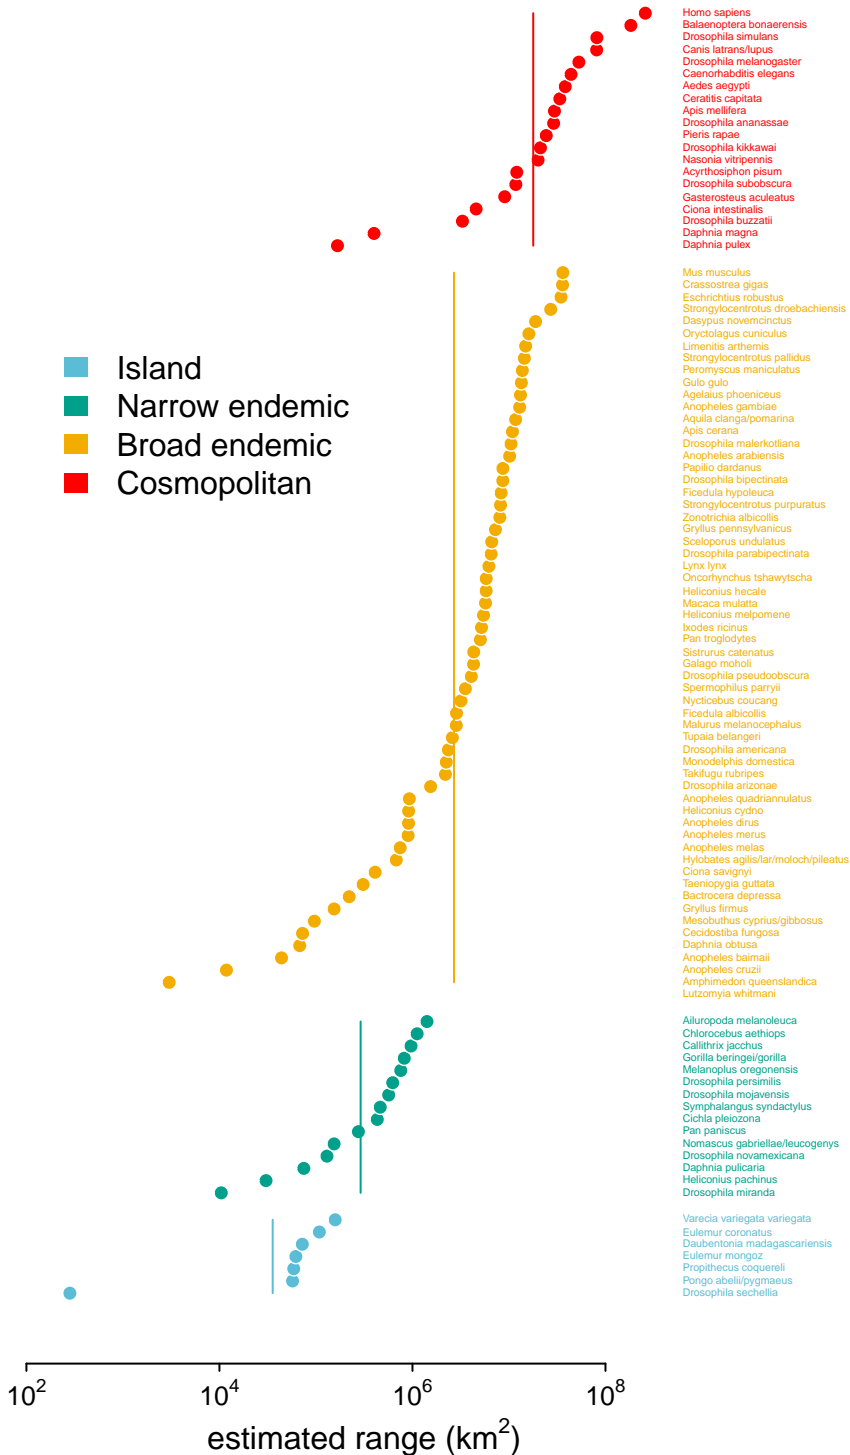

Supplement: supp [file elife_poa_e67509_Figure_1_figure_supplement_4.pdf › elife_poa_e67509_Figure_1_figure_supplement_4.pdf]

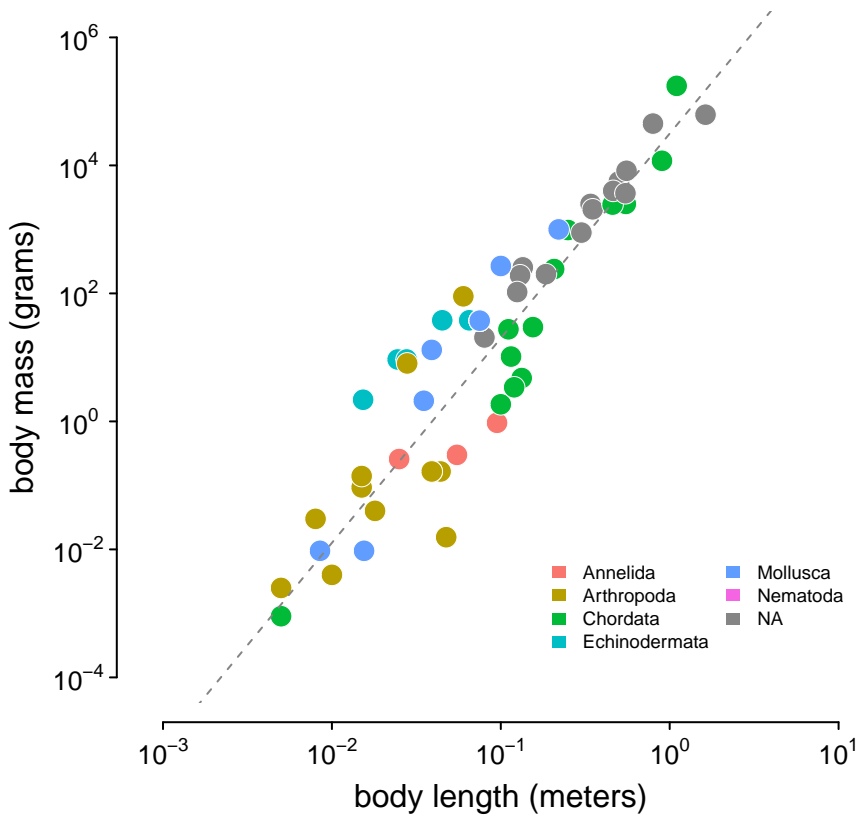

Supplement: supp [file elife_poa_e67509_Figure_1_figure_supplement_5.pdf › elife_poa_e67509_Figure_1_figure_supplement_5.pdf]

pairwise diversity (differences per bp)

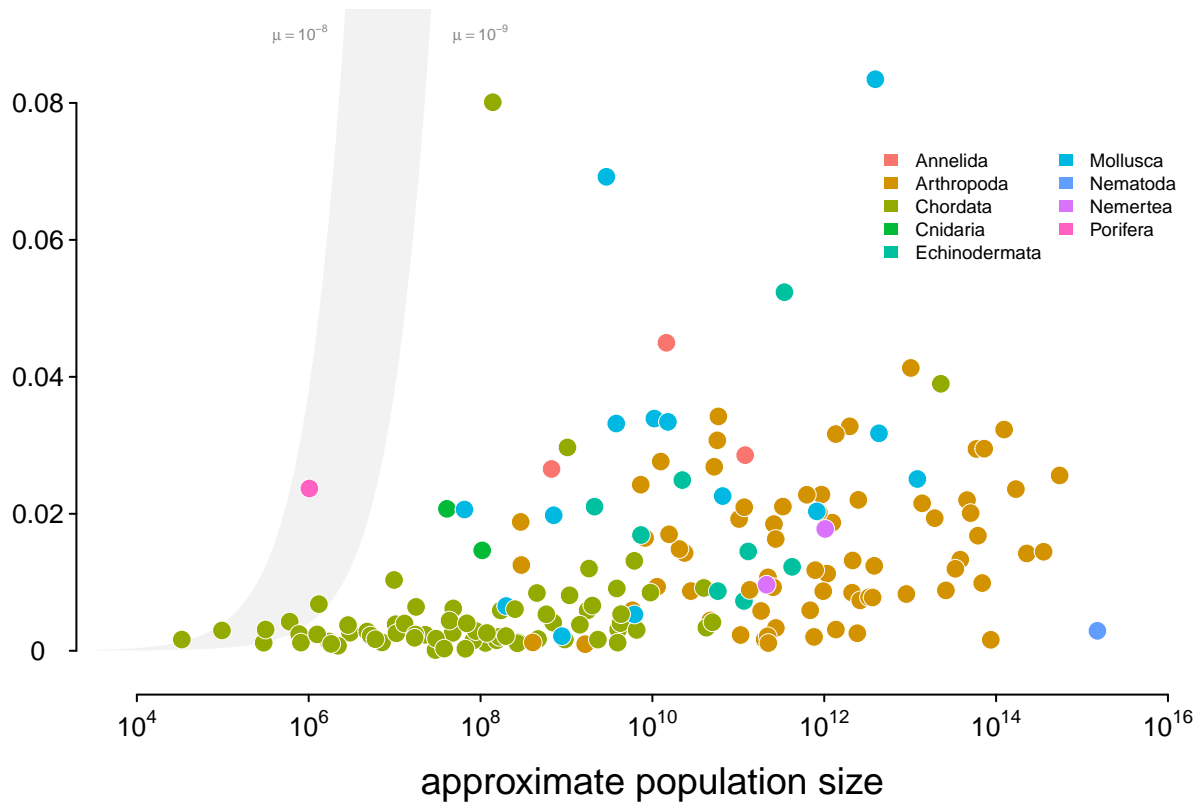

Supplement: supp [file elife_poa_e67509_Figure_2_figure_supplement_1.pdf › elife_poa_e67509_Figure_2_figure_supplement_1.pdf]

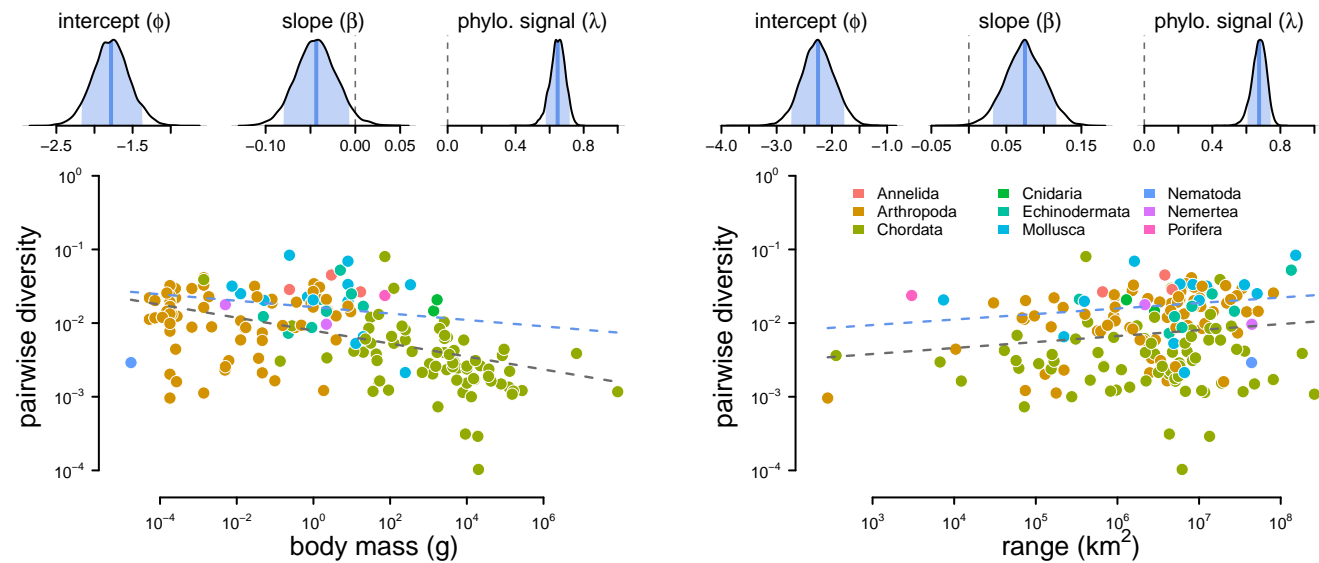

Supplement: supp [file elife_poa_e67509_Figure_2_figure_supplement_3.pdf › elife_poa_e67509_Figure_2_figure_supplement_3.pdf]

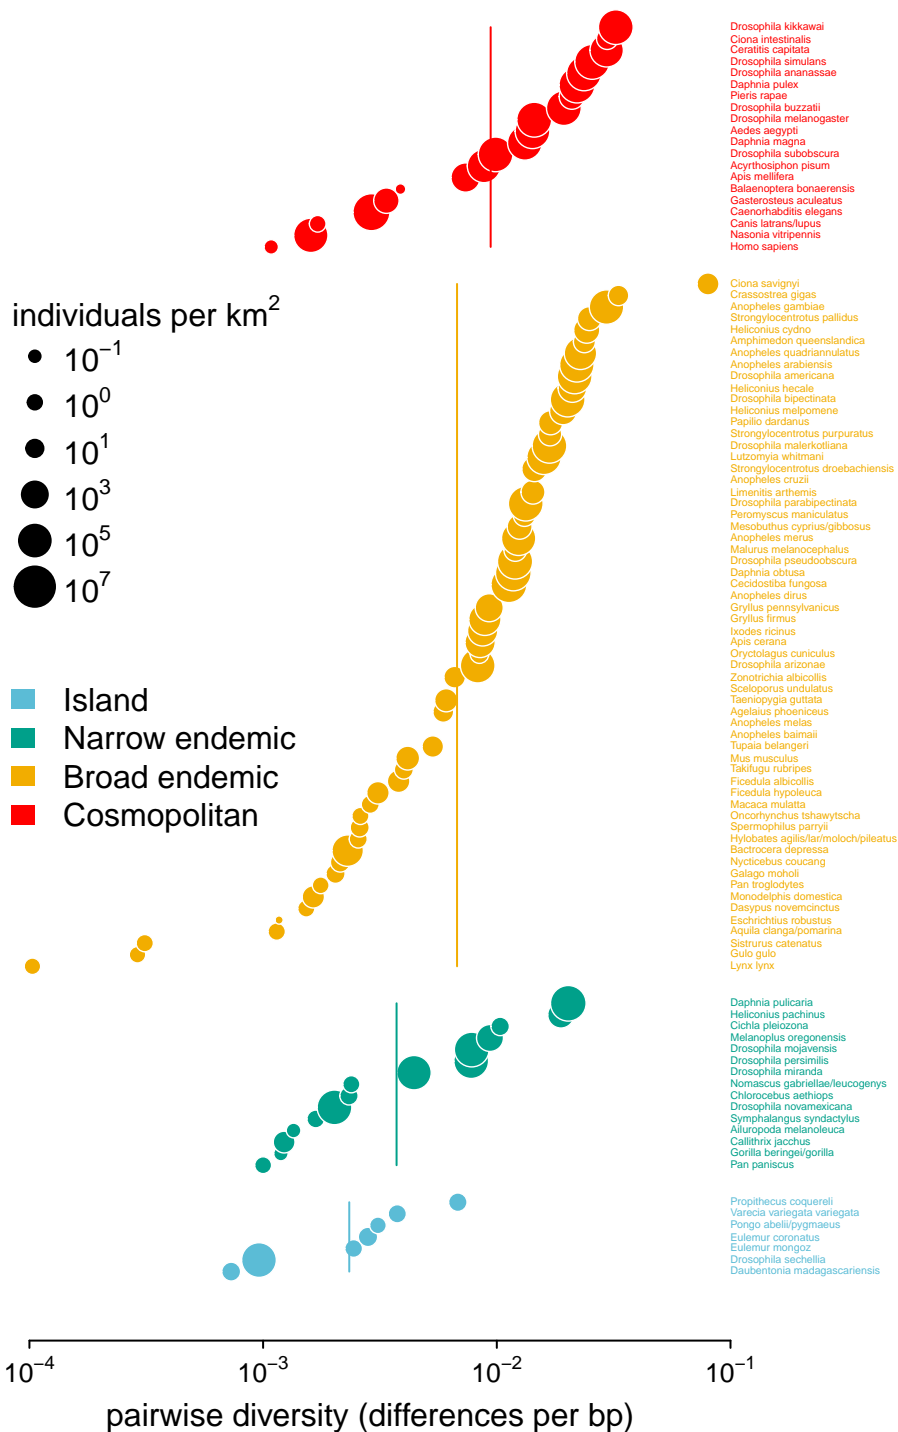

Supplement: supp [file elife_poa_e67509_Figure_2_figure_supplement_4.pdf › elife_poa_e67509_Figure_2_figure_supplement_4.pdf]

## diversity

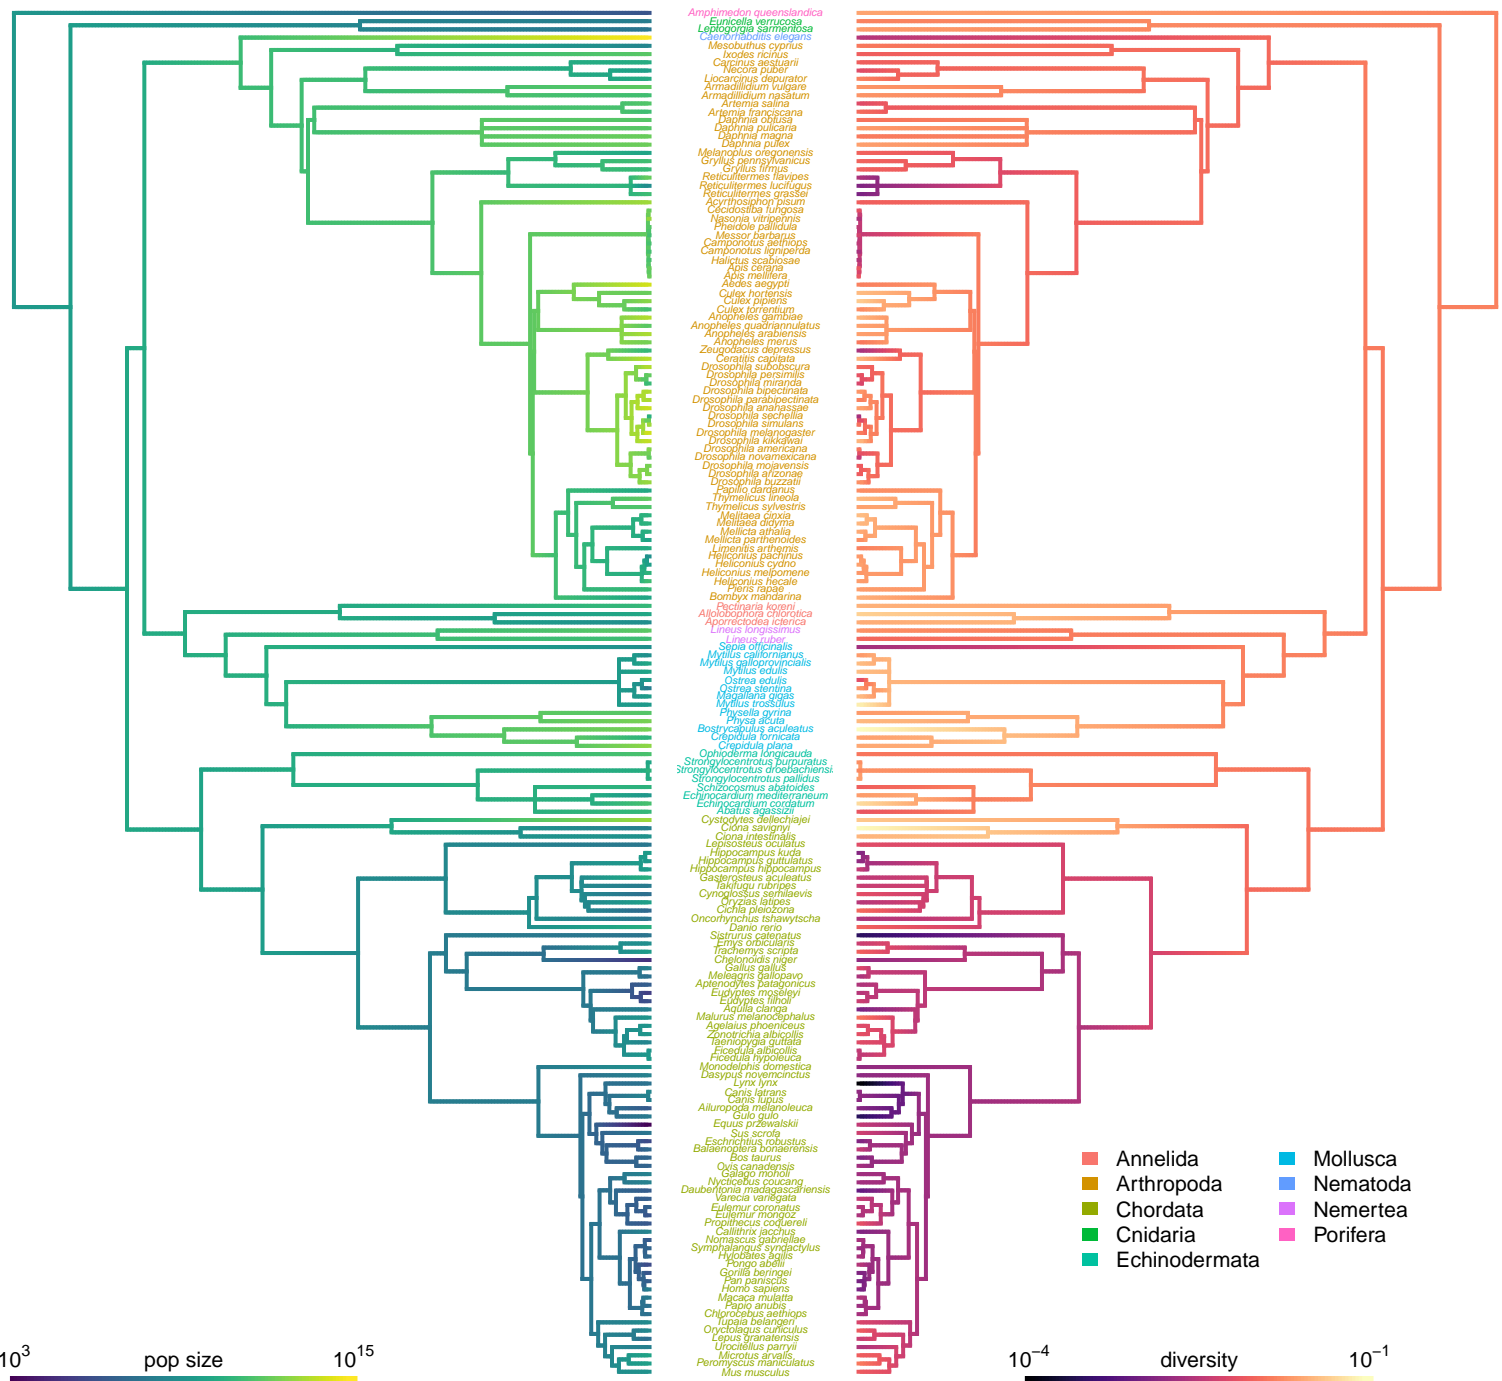

Supplement: supp [file elife_poa_e67509_Figure_3_figure_supplement_2.pdf › elife_poa_e67509_Figure_3_figure_supplement_2.pdf]

genome size (Gb)

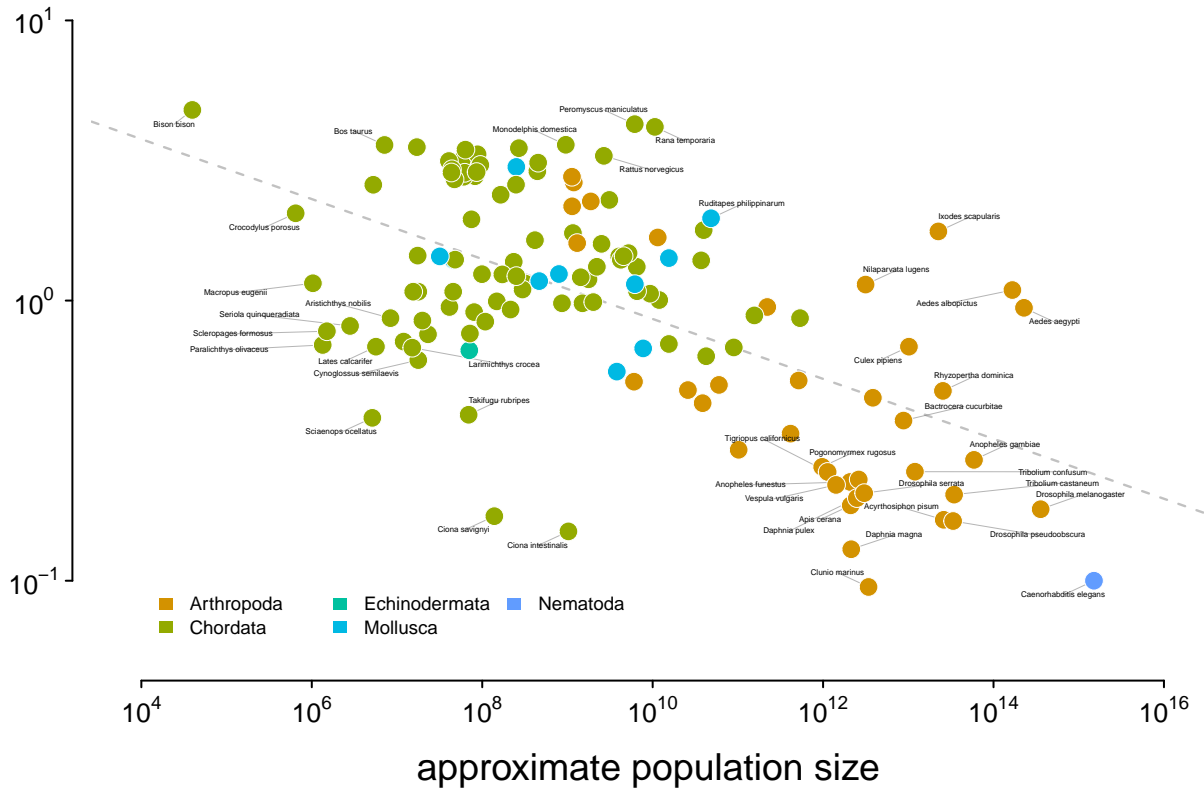

Supplement: supp [file elife_poa_e67509_Figure_4_figure_supplement_1.pdf › elife_poa_e67509_Figure_4_figure_supplement_1.pdf]

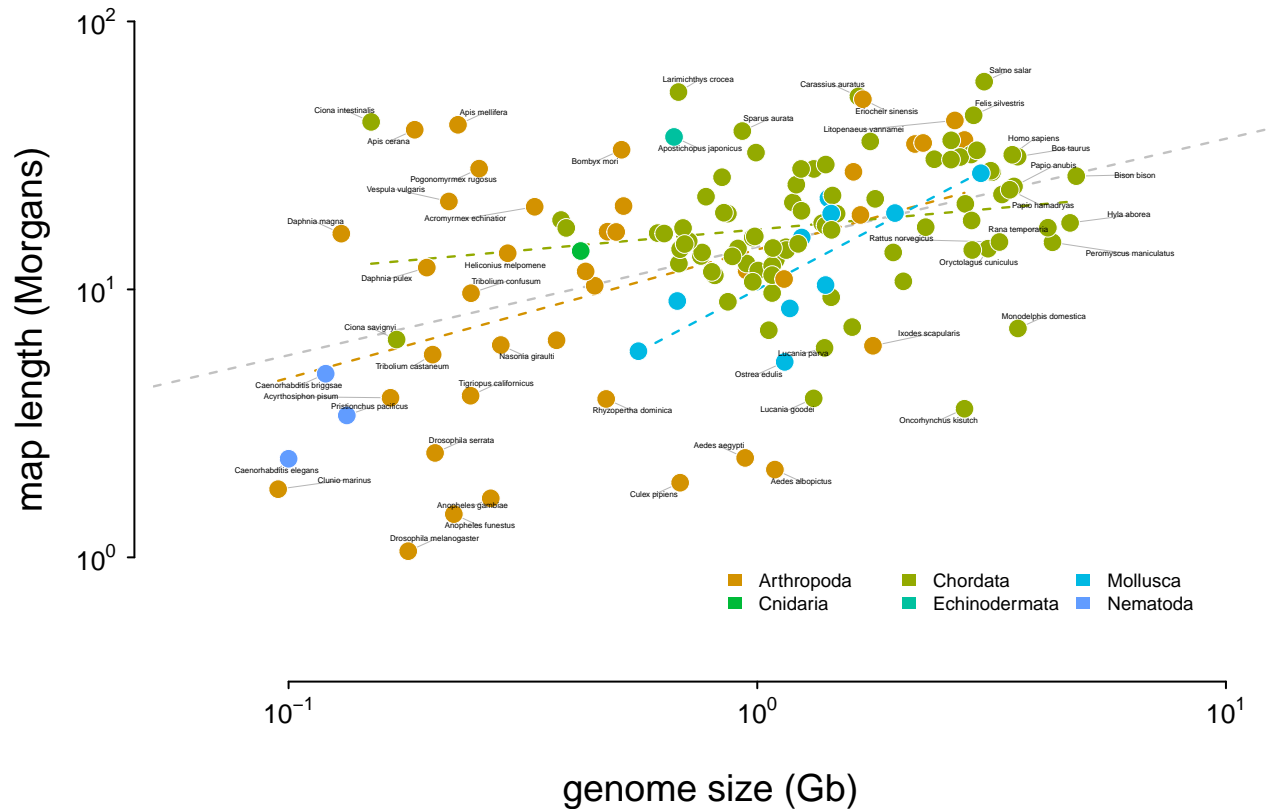

Supplement: supp [file elife_poa_e67509_Figure_4_figure_supplement_2.pdf › elife_poa_e67509_Figure_4_figure_supplement_2.pdf]

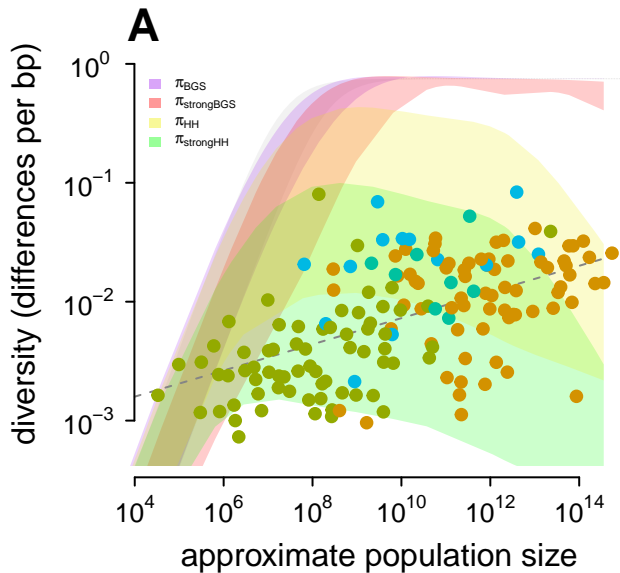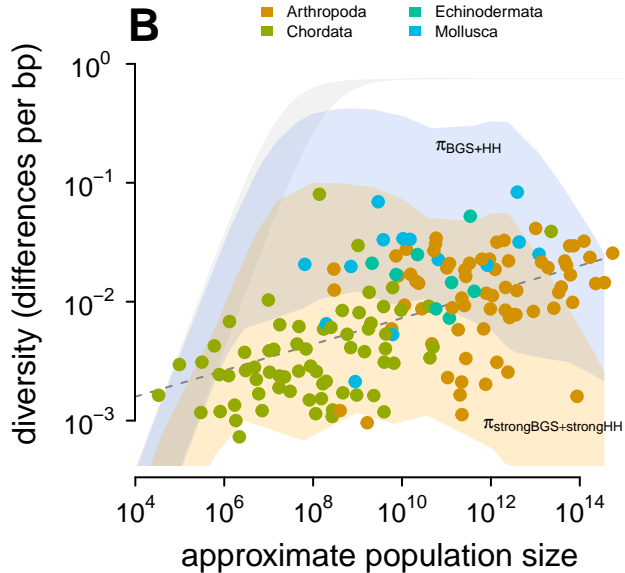

Supplement: supp [file elife_poa_e67509_Figure_4_figure_supplement_3.pdf › elife_poa_e67509_Figure_4_figure_supplement_3.pdf]

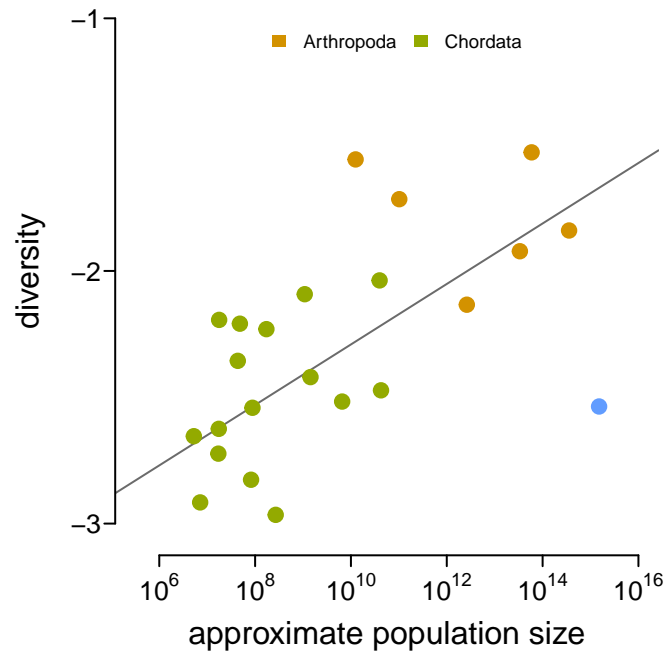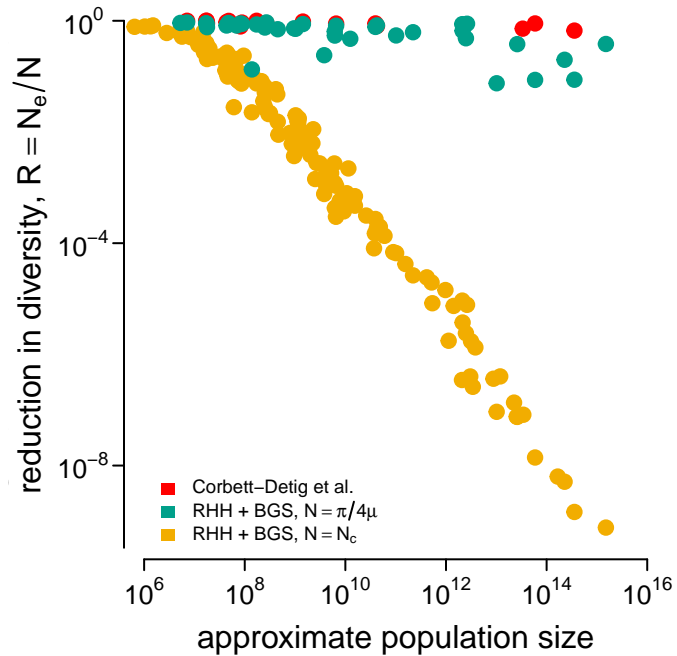

Supplement: supp [file elife_poa_e67509_Figure_4_figure_supplement_4.pdf › elife_poa_e67509_Figure_4_figure_supplement_4.pdf]

**A**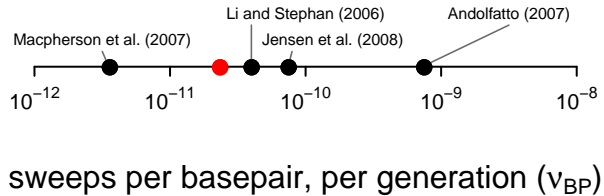**B**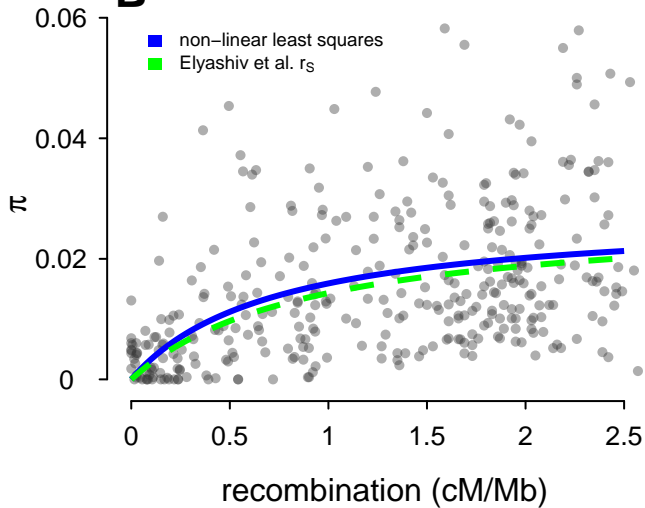

Supplement: supp [file elife_poa_e67509_Figure_4_figure_supplement_5.pdf › elife_poa_e67509_Figure_4_figure_supplement_5.pdf]
